# Supplementary material
Source: publisher figshare collection journal article supplement (https://acs.figshare.com/ndownloader/files/4059796)
Supplement: Supplementary file 1 [file 4059796]

data_global

# 1. SUBMISSION DETAILS

_publ_contact_author
;
        Prof. Dr. Martin Albrecht
        School of Chemistry and Chemical Biology
        University College Dublin
        Belfield
        Dublin 4
        Ireland
;
_publ_contact_author_phone     '00353 1 716-2504'
_publ_contact_author_fax       '00353 1 716-2501'
_publ_contact_author_email     'martin.albrecht@ucd.ie'
_publ_requested_journal        'Inorganic Chemistry'
_publ_requested_coeditor_name  ?


# 2. TITLE AND AUTHOR LIST

_publ_section_title
;

;

loop_
 _publ_author_name
 _publ_author_address
      'Vivienne Leigh'
;     School of Chemistry and Chemical Biology
      University College Dublin
      Belfield
      Dublin 4
      Ireland
;
      'Wadi Ghattas'
;     School of Chemistry and Chemical Biology
      University College Dublin
      Belfield
      Dublin 4
      Ireland
;
      'Ralte Lalrempuia'
;     School of Chemistry and Chemical Biology
      University College Dublin
      Belfield
      Dublin 4
      Ireland
;
      'Helge M\"uller-Bunz'
;     School of Chemistry and Chemical Biology
      University College Dublin
      Belfield
      Dublin 4
      Ireland
;
      'Mary T. Pryce'
;     School of Chemical Sciences
      Dublin City University
      Glasnevin
      Dublin 9
      Ireland
;
      'Martin Albrecht'
;     School of Chemistry and Chemical Biology
      University College Dublin
      Belfield
      Dublin 4
      Ireland
;
#===END_data_global
  
data_alb53 
  
_audit_creation_method            SHELXL-97 
_chemical_name_systematic 
; 
 ? 
; 
_chemical_name_common             ? 
_chemical_melting_point           ? 
_chemical_formula_moiety 
 'C19 H23 Cl N3 Ru, F6 P' 
_chemical_formula_sum 
 'C19 H23 Cl F6 N3 P Ru' 
_chemical_formula_weight          574.89 
  
loop_ 
 _atom_type_symbol 
 _atom_type_description 
 _atom_type_scat_dispersion_real 
 _atom_type_scat_dispersion_imag 
 _atom_type_scat_source 
 'C'  'C'   0.0033   0.0016 
 'International Tables Vol C Tables 4.2.6.8 and 6.1.1.4' 
 'H'  'H'   0.0000   0.0000 
 'International Tables Vol C Tables 4.2.6.8 and 6.1.1.4' 
 'N'  'N'   0.0061   0.0033 
 'International Tables Vol C Tables 4.2.6.8 and 6.1.1.4' 
 'F'  'F'   0.0171   0.0103 
 'International Tables Vol C Tables 4.2.6.8 and 6.1.1.4' 
 'P'  'P'   0.1023   0.0942 
 'International Tables Vol C Tables 4.2.6.8 and 6.1.1.4' 
 'Cl'  'Cl'   0.1484   0.1585 
 'International Tables Vol C Tables 4.2.6.8 and 6.1.1.4' 
 'Ru'  'Ru'  -1.2594   0.8363 
 'International Tables Vol C Tables 4.2.6.8 and 6.1.1.4' 
  
_symmetry_cell_setting            monoclinic 
_symmetry_space_group_name_H-M    'P 21/c' 
_symmetry_space_group_name_Hall   '-P 2ybc' 
  
loop_ 
 _symmetry_equiv_pos_as_xyz 
 'x, y, z' 
 '-x, y+1/2, -z+1/2' 
 '-x, -y, -z' 
 'x, -y-1/2, z-1/2' 
  
_cell_length_a                    11.9352(4) 
_cell_length_b                    10.9933(3) 
_cell_length_c                    16.9445(4) 
_cell_angle_alpha                 90.00 
_cell_angle_beta                  96.926(2) 
_cell_angle_gamma                 90.00 
_cell_volume                      2206.99(10) 
_cell_formula_units_Z             4 
_cell_measurement_temperature     100(2) 
_cell_measurement_reflns_used     62708 
_cell_measurement_theta_min       3.3511 
_cell_measurement_theta_max       33.0708 
  
_exptl_crystal_description        ? 
_exptl_crystal_colour             ? 
_exptl_crystal_size_max           0.1317 
_exptl_crystal_size_mid           0.0961 
_exptl_crystal_size_min           0.0609 
_exptl_crystal_density_meas       ? 
_exptl_crystal_density_diffrn     1.730 
_exptl_crystal_density_method     'not measured' 
_exptl_crystal_F_000              1152 
_exptl_absorpt_coefficient_mu     0.966 
_exptl_absorpt_correction_type    analytical 
_exptl_absorpt_correction_T_min   0.912 
_exptl_absorpt_correction_T_max   0.954 
_exptl_absorpt_process_details     
; 
CrysAlisPro, Oxford Diffraction Ltd., 
Version 1.171.33.66 (release 28-04-2010 CrysAlis171 .NET) 
(compiled Apr 28 2010,14:27:37) 
Analytical numeric absorption correction using a multifaceted crystal
model based on expressions derived by R.C. Clark & J.S. Reid.
(Clark, R. C. & Reid, J. S. (1995). Acta Cryst. A51, 887-897)
; 
  
_exptl_special_details 
; 
 ? 
; 
  
_diffrn_ambient_temperature       100(2) 
_diffrn_radiation_wavelength      0.71073 
_diffrn_radiation_type            MoK\a 
_diffrn_radiation_source          'SuperNova (Mo) X-ray Source' 
_diffrn_radiation_monochromator   mirror 
_diffrn_measurement_device_type   'SuperNova, Dual, Cu at zero, Atlas' 
_diffrn_measurement_method        '\w scans' 
_diffrn_detector_area_resol_mean  10.3196 
_diffrn_standards_number          ? 
_diffrn_standards_interval_count  ? 
_diffrn_standards_interval_time   ? 
_diffrn_standards_decay_%         ? 
_diffrn_reflns_number             113230 
_diffrn_reflns_av_R_equivalents   0.0591 
_diffrn_reflns_av_sigmaI/netI     0.0226 
_diffrn_reflns_limit_h_min        -18 
_diffrn_reflns_limit_h_max        17 
_diffrn_reflns_limit_k_min        -16 
_diffrn_reflns_limit_k_max        16 
_diffrn_reflns_limit_l_min        -25 
_diffrn_reflns_limit_l_max        25 
_diffrn_reflns_theta_min          3.35 
_diffrn_reflns_theta_max          33.15 
_reflns_number_total              8059 
_reflns_number_gt                 6678 
_reflns_threshold_expression      I>2\s(I) 
  
_computing_data_collection         
; 
CrysAlisPro, Oxford Diffraction Ltd., 
Version 1.171.33.66 (release 28-04-2010 CrysAlis171 .NET) 
(compiled Apr 28 2010,14:27:37) 
; 
_computing_cell_refinement         
; 
CrysAlisPro, Oxford Diffraction Ltd., 
Version 1.171.33.66 (release 28-04-2010 CrysAlis171 .NET) 
(compiled Apr 28 2010,14:27:37) 
; 
_computing_data_reduction          
; 
CrysAlisPro, Oxford Diffraction Ltd., 
Version 1.171.33.66 (release 28-04-2010 CrysAlis171 .NET) 
(compiled Apr 28 2010,14:27:37) 
; 
_computing_structure_solution     'SHELXS-97 (Sheldrick, 2008)' 
_computing_structure_refinement   'SHELXL-97 (Sheldrick, 2008)' 
_computing_molecular_graphics     ? 
_computing_publication_material   ? 
  
_refine_special_details 
; 
 Refinement of F^2^ against ALL reflections.  The weighted R-factor wR and 
 goodness of fit S are based on F^2^, conventional R-factors R are based 
 on F, with F set to zero for negative F^2^. The threshold expression of 
 F^2^ > 2sigma(F^2^) is used only for calculating R-factors(gt) etc. and is 
 not relevant to the choice of reflections for refinement.  R-factors based 
 on F^2^ are statistically about twice as large as those based on F, and R- 
 factors based on ALL data will be even larger. 
; 
  
_refine_ls_structure_factor_coef  Fsqd 
_refine_ls_matrix_type            full 
_refine_ls_weighting_scheme       calc 
_refine_ls_weighting_details 
 'calc w=1/[\s^2^(Fo^2^)+(0.0536P)^2^+3.3614P] where P=(Fo^2^+2Fc^2^)/3' 
_atom_sites_solution_primary      direct 
_atom_sites_solution_secondary    difmap 
_atom_sites_solution_hydrogens    geom 
_refine_ls_hydrogen_treatment     constr 
_refine_ls_extinction_method      none 
_refine_ls_extinction_coef        ? 
_refine_ls_number_reflns          8059 
_refine_ls_number_parameters      284 
_refine_ls_number_restraints      0 
_refine_ls_R_factor_all           0.0493 
_refine_ls_R_factor_gt            0.0386 
_refine_ls_wR_factor_ref          0.1055 
_refine_ls_wR_factor_gt           0.1009 
_refine_ls_goodness_of_fit_ref    1.062 
_refine_ls_restrained_S_all       1.062 
_refine_ls_shift/su_max           0.001 
_refine_ls_shift/su_mean          0.000 
  
loop_ 
 _atom_site_label 
 _atom_site_type_symbol 
 _atom_site_fract_x 
 _atom_site_fract_y 
 _atom_site_fract_z 
 _atom_site_U_iso_or_equiv 
 _atom_site_adp_type 
 _atom_site_occupancy 
 _atom_site_symmetry_multiplicity 
 _atom_site_calc_flag 
 _atom_site_refinement_flags 
 _atom_site_disorder_assembly 
 _atom_site_disorder_group 
Ru Ru 0.703277(13) 0.213951(15) 1.022003(10) 0.01752(5) Uani 1 1 d . . . 
Cl Cl 0.53097(5) 0.20024(5) 1.08143(4) 0.02580(12) Uani 1 1 d . . . 
C1 C 0.85336(18) 0.1727(2) 0.96304(14) 0.0231(4) Uani 1 1 d . . . 
C7 C 0.8991(2) 0.2362(3) 0.89351(17) 0.0325(5) Uani 1 1 d . . . 
H7 H 0.8398 0.2322 0.8465 0.039 Uiso 1 1 calc R . . 
C8 C 1.0027(2) 0.1652(3) 0.87318(19) 0.0376(6) Uani 1 1 d . . . 
H8A H 1.0614 0.1666 0.9189 0.056 Uiso 1 1 calc R . . 
H8B H 1.0316 0.2029 0.8273 0.056 Uiso 1 1 calc R . . 
H8C H 0.9811 0.0808 0.8604 0.056 Uiso 1 1 calc R . . 
C9 C 0.9292(3) 0.3693(3) 0.9091(3) 0.0540(10) Uani 1 1 d . . . 
H9A H 0.8630 0.4130 0.9235 0.081 Uiso 1 1 calc R . . 
H9B H 0.9534 0.4055 0.8611 0.081 Uiso 1 1 calc R . . 
H9C H 0.9907 0.3750 0.9529 0.081 Uiso 1 1 calc R . . 
C2 C 0.88641(19) 0.2046(2) 1.04303(15) 0.0259(5) Uani 1 1 d . . . 
H2 H 0.9384 0.2694 1.0548 0.031 Uiso 1 1 calc R . . 
C3 C 0.8435(2) 0.1416(3) 1.10676(17) 0.0362(6) Uani 1 1 d . . . 
H3 H 0.8686 0.1634 1.1602 0.043 Uiso 1 1 calc R . . 
C4 C 0.7649(2) 0.0481(3) 1.0907(2) 0.0427(8) Uani 1 1 d . . . 
C10 C 0.7143(4) -0.0137(5) 1.1573(3) 0.0826(19) Uani 1 1 d . . . 
H10A H 0.6432 -0.0529 1.1363 0.124 Uiso 1 1 calc R . . 
H10B H 0.6999 0.0468 1.1974 0.124 Uiso 1 1 calc R . . 
H10C H 0.7670 -0.0752 1.1817 0.124 Uiso 1 1 calc R . . 
C5 C 0.7329(2) 0.0129(2) 1.0111(2) 0.0426(8) Uani 1 1 d . . . 
H5 H 0.6815 -0.0525 0.9995 0.051 Uiso 1 1 calc R . . 
C6 C 0.7767(2) 0.0741(2) 0.94902(18) 0.0319(5) Uani 1 1 d . . . 
H6 H 0.7544 0.0488 0.8958 0.038 Uiso 1 1 calc R . . 
N1 N 0.60649(15) 0.29218(17) 0.92382(11) 0.0183(3) Uani 1 1 d . . . 
C11 C 0.5517(2) 0.2273(3) 0.86288(15) 0.0281(5) Uani 1 1 d . . . 
H11 H 0.5543 0.1410 0.8650 0.034 Uiso 1 1 calc R . . 
C12 C 0.4924(2) 0.2830(3) 0.79806(15) 0.0312(5) Uani 1 1 d . . . 
H12 H 0.4558 0.2365 0.7552 0.037 Uiso 1 1 calc R . . 
C13 C 0.4876(2) 0.4097(3) 0.79731(15) 0.0288(5) Uani 1 1 d . . . 
H13 H 0.4481 0.4500 0.7528 0.035 Uiso 1 1 calc R . . 
C14 C 0.53932(17) 0.4778(2) 0.85989(13) 0.0222(4) Uani 1 1 d . . . 
H14 H 0.5345 0.5640 0.8601 0.027 Uiso 1 1 calc R . . 
C15 C 0.59880(16) 0.4144(2) 0.92264(12) 0.0170(3) Uani 1 1 d . . . 
N2 N 0.65495(14) 0.46858(16) 0.99027(10) 0.0163(3) Uani 1 1 d . . . 
C16 C 0.70626(16) 0.39242(19) 1.04780(12) 0.0159(3) Uani 1 1 d . . . 
C17 C 0.66737(18) 0.59080(19) 1.01134(13) 0.0197(4) Uani 1 1 d . . . 
H17 H 0.6397 0.6591 0.9806 0.024 Uiso 1 1 calc R . . 
C18 C 0.72628(19) 0.5922(2) 1.08377(14) 0.0239(4) Uani 1 1 d . . . 
H18 H 0.7490 0.6623 1.1145 0.029 Uiso 1 1 calc R . . 
N3 N 0.74829(16) 0.46977(19) 1.10592(11) 0.0222(4) Uani 1 1 d . . . 
C19 C 0.8075(2) 0.4331(3) 1.18225(15) 0.0320(5) Uani 1 1 d . . . 
H19A H 0.7739 0.3581 1.2000 0.048 Uiso 1 1 calc R . . 
H19B H 0.8011 0.4976 1.2214 0.048 Uiso 1 1 calc R . . 
H19C H 0.8872 0.4190 1.1768 0.048 Uiso 1 1 calc R . . 
P P 0.81797(5) 0.74152(6) 0.33779(3) 0.01993(11) Uani 1 1 d . . . 
F1 F 0.79330(14) 0.73626(16) 0.24284(9) 0.0321(3) Uani 1 1 d . . . 
F2 F 0.84158(16) 0.7436(2) 0.43247(10) 0.0434(4) Uani 1 1 d . . . 
F3 F 0.92234(14) 0.82986(16) 0.33151(10) 0.0356(4) Uani 1 1 d . . . 
F4 F 0.89907(13) 0.62592(15) 0.33734(10) 0.0340(3) Uani 1 1 d . . . 
F5 F 0.71267(14) 0.6513(2) 0.34221(13) 0.0520(6) Uani 1 1 d . . . 
F6 F 0.73525(15) 0.85516(18) 0.33802(10) 0.0411(4) Uani 1 1 d . . . 
  
loop_ 
 _atom_site_aniso_label 
 _atom_site_aniso_U_11 
 _atom_site_aniso_U_22 
 _atom_site_aniso_U_33 
 _atom_site_aniso_U_23 
 _atom_site_aniso_U_13 
 _atom_site_aniso_U_12 
Ru 0.01241(8) 0.01730(8) 0.02323(9) 0.00282(6) 0.00369(5) 0.00505(5) 
Cl 0.0179(2) 0.0296(3) 0.0315(3) 0.0082(2) 0.00962(19) 0.00767(18) 
C1 0.0147(8) 0.0243(10) 0.0313(11) 0.0008(9) 0.0068(8) 0.0072(7) 
C7 0.0228(11) 0.0435(15) 0.0331(13) 0.0087(11) 0.0112(9) 0.0082(10) 
C8 0.0283(12) 0.0439(16) 0.0441(15) -0.0043(12) 0.0192(11) 0.0050(11) 
C9 0.056(2) 0.0349(15) 0.080(3) 0.0218(16) 0.0432(19) 0.0125(14) 
C2 0.0134(8) 0.0330(12) 0.0308(11) 0.0033(9) 0.0012(8) 0.0093(8) 
C3 0.0263(11) 0.0521(17) 0.0305(12) 0.0144(12) 0.0050(9) 0.0237(12) 
C4 0.0331(13) 0.0402(15) 0.0586(19) 0.0311(14) 0.0217(13) 0.0227(12) 
C10 0.060(2) 0.083(3) 0.115(4) 0.079(3) 0.054(3) 0.043(2) 
C5 0.0257(12) 0.0165(10) 0.089(3) 0.0045(12) 0.0215(14) 0.0049(9) 
C6 0.0220(10) 0.0271(11) 0.0478(15) -0.0130(11) 0.0093(10) 0.0054(9) 
N1 0.0133(7) 0.0243(8) 0.0170(8) -0.0028(6) 0.0014(6) 0.0032(6) 
C11 0.0239(10) 0.0352(13) 0.0242(11) -0.0073(9) -0.0007(8) 0.0020(9) 
C12 0.0248(11) 0.0478(15) 0.0196(10) -0.0074(10) -0.0032(8) -0.0009(10) 
C13 0.0207(10) 0.0416(14) 0.0241(11) 0.0071(10) 0.0019(8) 0.0004(9) 
C14 0.0145(8) 0.0310(11) 0.0208(9) 0.0112(8) 0.0011(7) 0.0011(7) 
C15 0.0107(7) 0.0255(9) 0.0149(8) 0.0051(7) 0.0024(6) 0.0039(7) 
N2 0.0145(7) 0.0183(7) 0.0161(7) 0.0028(6) 0.0022(6) 0.0029(6) 
C16 0.0129(7) 0.0200(9) 0.0144(8) 0.0027(7) 0.0003(6) 0.0021(6) 
C17 0.0182(8) 0.0179(9) 0.0238(10) 0.0032(7) 0.0049(7) 0.0016(7) 
C18 0.0242(10) 0.0265(11) 0.0214(10) 0.0013(8) 0.0038(8) 0.0023(8) 
N3 0.0211(8) 0.0273(9) 0.0178(8) -0.0011(7) 0.0003(6) 0.0016(7) 
C19 0.0344(13) 0.0384(13) 0.0206(11) -0.0008(10) -0.0079(9) 0.0057(10) 
P 0.0154(2) 0.0251(3) 0.0193(2) 0.0032(2) 0.00193(18) 0.00326(19) 
F1 0.0382(8) 0.0394(9) 0.0177(6) -0.0025(6) -0.0007(6) 0.0034(7) 
F2 0.0401(9) 0.0709(13) 0.0188(7) 0.0073(8) 0.0021(6) 0.0185(9) 
F3 0.0310(8) 0.0302(8) 0.0441(9) 0.0033(7) -0.0009(7) -0.0117(6) 
F4 0.0278(7) 0.0266(7) 0.0451(9) -0.0026(6) -0.0062(6) 0.0077(6) 
F5 0.0209(7) 0.0650(13) 0.0666(13) 0.0388(11) -0.0088(8) -0.0115(8) 
F6 0.0426(9) 0.0489(10) 0.0317(8) 0.0009(7) 0.0043(7) 0.0291(8) 
  
_geom_special_details 
; 
 All esds (except the esd in the dihedral angle between two l.s. planes) 
 are estimated using the full covariance matrix.  The cell esds are taken 
 into account individually in the estimation of esds in distances, angles 
 and torsion angles; correlations between esds in cell parameters are only 
 used when they are defined by crystal symmetry.  An approximate (isotropic) 
 treatment of cell esds is used for estimating esds involving l.s. planes. 
; 
  
loop_ 
 _geom_bond_atom_site_label_1 
 _geom_bond_atom_site_label_2 
 _geom_bond_distance 
 _geom_bond_site_symmetry_2 
 _geom_bond_publ_flag 
Ru C16 2.009(2) . ? 
Ru N1 2.0925(18) . ? 
Ru C2 2.174(2) . ? 
Ru C1 2.201(2) . ? 
Ru C3 2.218(2) . ? 
Ru C6 2.219(2) . ? 
Ru C4 2.239(3) . ? 
Ru C5 2.250(3) . ? 
Ru Cl 2.4011(6) . ? 
C1 C2 1.409(4) . ? 
C1 C6 1.419(4) . ? 
C1 C7 1.525(4) . ? 
C7 C9 1.523(5) . ? 
C7 C8 1.536(4) . ? 
C7 H7 1.0000 . ? 
C8 H8A 0.9800 . ? 
C8 H8B 0.9800 . ? 
C8 H8C 0.9800 . ? 
C9 H9A 0.9800 . ? 
C9 H9B 0.9800 . ? 
C9 H9C 0.9800 . ? 
C2 C3 1.429(4) . ? 
C2 H2 0.9500 . ? 
C3 C4 1.397(5) . ? 
C3 H3 0.9500 . ? 
C4 C5 1.412(5) . ? 
C4 C10 1.505(4) . ? 
C10 H10A 0.9800 . ? 
C10 H10B 0.9800 . ? 
C10 H10C 0.9800 . ? 
C5 C6 1.402(4) . ? 
C5 H5 0.9500 . ? 
C6 H6 0.9500 . ? 
N1 C15 1.347(3) . ? 
N1 C11 1.356(3) . ? 
C11 C12 1.376(4) . ? 
C11 H11 0.9500 . ? 
C12 C13 1.394(4) . ? 
C12 H12 0.9500 . ? 
C13 C14 1.381(4) . ? 
C13 H13 0.9500 . ? 
C14 C15 1.392(3) . ? 
C14 H14 0.9500 . ? 
C15 N2 1.390(3) . ? 
N2 C16 1.372(2) . ? 
N2 C17 1.393(3) . ? 
C16 N3 1.351(3) . ? 
C17 C18 1.339(3) . ? 
C17 H17 0.9500 . ? 
C18 N3 1.414(3) . ? 
C18 H18 0.9500 . ? 
N3 C19 1.454(3) . ? 
C19 H19A 0.9800 . ? 
C19 H19B 0.9800 . ? 
C19 H19C 0.9800 . ? 
P F6 1.5925(17) . ? 
P F3 1.5931(17) . ? 
P F2 1.5953(17) . ? 
P F4 1.5981(16) . ? 
P F1 1.6013(16) . ? 
P F5 1.6100(18) . ? 
  
loop_ 
 _geom_angle_atom_site_label_1 
 _geom_angle_atom_site_label_2 
 _geom_angle_atom_site_label_3 
 _geom_angle 
 _geom_angle_site_symmetry_1 
 _geom_angle_site_symmetry_3 
 _geom_angle_publ_flag 
C16 Ru N1 76.42(7) . . ? 
C16 Ru C2 91.11(9) . . ? 
N1 Ru C2 126.69(9) . . ? 
C16 Ru C1 107.81(9) . . ? 
N1 Ru C1 97.20(8) . . ? 
C2 Ru C1 37.58(9) . . ? 
C16 Ru C3 102.54(11) . . ? 
N1 Ru C3 164.49(9) . . ? 
C2 Ru C3 37.95(10) . . ? 
C1 Ru C3 68.15(9) . . ? 
C16 Ru C6 143.12(9) . . ? 
N1 Ru C6 93.38(9) . . ? 
C2 Ru C6 66.52(10) . . ? 
C1 Ru C6 37.47(9) . . ? 
C3 Ru C6 78.12(11) . . ? 
C16 Ru C4 133.30(12) . . ? 
N1 Ru C4 149.68(12) . . ? 
C2 Ru C4 67.40(11) . . ? 
C1 Ru C4 80.45(9) . . ? 
C3 Ru C4 36.52(13) . . ? 
C6 Ru C4 66.34(12) . . ? 
C16 Ru C5 168.07(11) . . ? 
N1 Ru C5 114.55(11) . . ? 
C2 Ru C5 78.59(10) . . ? 
C1 Ru C5 67.39(10) . . ? 
C3 Ru C5 65.61(13) . . ? 
C6 Ru C5 36.56(12) . . ? 
C4 Ru C5 36.66(14) . . ? 
C16 Ru Cl 87.92(6) . . ? 
N1 Ru Cl 86.59(5) . . ? 
C2 Ru Cl 145.41(7) . . ? 
C1 Ru Cl 164.27(7) . . ? 
C3 Ru Cl 108.89(7) . . ? 
C6 Ru Cl 127.32(7) . . ? 
C4 Ru Cl 88.56(7) . . ? 
C5 Ru Cl 97.12(7) . . ? 
C2 C1 C6 116.8(2) . . ? 
C2 C1 C7 123.0(2) . . ? 
C6 C1 C7 120.2(2) . . ? 
C2 C1 Ru 70.18(13) . . ? 
C6 C1 Ru 71.94(13) . . ? 
C7 C1 Ru 130.00(16) . . ? 
C9 C7 C1 113.8(2) . . ? 
C9 C7 C8 110.3(2) . . ? 
C1 C7 C8 108.3(2) . . ? 
C9 C7 H7 108.1 . . ? 
C1 C7 H7 108.1 . . ? 
C8 C7 H7 108.1 . . ? 
C7 C8 H8A 109.5 . . ? 
C7 C8 H8B 109.5 . . ? 
H8A C8 H8B 109.5 . . ? 
C7 C8 H8C 109.5 . . ? 
H8A C8 H8C 109.5 . . ? 
H8B C8 H8C 109.5 . . ? 
C7 C9 H9A 109.5 . . ? 
C7 C9 H9B 109.5 . . ? 
H9A C9 H9B 109.5 . . ? 
C7 C9 H9C 109.5 . . ? 
H9A C9 H9C 109.5 . . ? 
H9B C9 H9C 109.5 . . ? 
C1 C2 C3 121.5(3) . . ? 
C1 C2 Ru 72.24(13) . . ? 
C3 C2 Ru 72.68(14) . . ? 
C1 C2 H2 119.3 . . ? 
C3 C2 H2 119.3 . . ? 
Ru C2 H2 128.1 . . ? 
C4 C3 C2 120.2(3) . . ? 
C4 C3 Ru 72.58(15) . . ? 
C2 C3 Ru 69.38(13) . . ? 
C4 C3 H3 119.9 . . ? 
C2 C3 H3 119.9 . . ? 
Ru C3 H3 130.8 . . ? 
C3 C4 C5 119.1(3) . . ? 
C3 C4 C10 120.5(4) . . ? 
C5 C4 C10 120.5(4) . . ? 
C3 C4 Ru 70.90(15) . . ? 
C5 C4 Ru 72.08(15) . . ? 
C10 C4 Ru 128.4(2) . . ? 
C4 C10 H10A 109.5 . . ? 
C4 C10 H10B 109.5 . . ? 
H10A C10 H10B 109.5 . . ? 
C4 C10 H10C 109.5 . . ? 
H10A C10 H10C 109.5 . . ? 
H10B C10 H10C 109.5 . . ? 
C6 C5 C4 120.2(3) . . ? 
C6 C5 Ru 70.51(14) . . ? 
C4 C5 Ru 71.26(16) . . ? 
C6 C5 H5 119.9 . . ? 
C4 C5 H5 119.9 . . ? 
Ru C5 H5 131.1 . . ? 
C5 C6 C1 122.2(3) . . ? 
C5 C6 Ru 72.93(15) . . ? 
C1 C6 Ru 70.59(13) . . ? 
C5 C6 H6 118.9 . . ? 
C1 C6 H6 118.9 . . ? 
Ru C6 H6 130.3 . . ? 
C15 N1 C11 119.2(2) . . ? 
C15 N1 Ru 116.87(14) . . ? 
C11 N1 Ru 123.96(17) . . ? 
N1 C11 C12 121.9(3) . . ? 
N1 C11 H11 119.1 . . ? 
C12 C11 H11 119.1 . . ? 
C11 C12 C13 117.9(2) . . ? 
C11 C12 H12 121.1 . . ? 
C13 C12 H12 121.1 . . ? 
C14 C13 C12 121.4(2) . . ? 
C14 C13 H13 119.3 . . ? 
C12 C13 H13 119.3 . . ? 
C13 C14 C15 117.0(2) . . ? 
C13 C14 H14 121.5 . . ? 
C15 C14 H14 121.5 . . ? 
N1 C15 N2 112.95(17) . . ? 
N1 C15 C14 122.5(2) . . ? 
N2 C15 C14 124.5(2) . . ? 
C16 N2 C15 117.00(18) . . ? 
C16 N2 C17 112.44(17) . . ? 
C15 N2 C17 130.55(18) . . ? 
N3 C16 N2 103.21(18) . . ? 
N3 C16 Ru 140.20(15) . . ? 
N2 C16 Ru 116.53(14) . . ? 
C18 C17 N2 105.91(19) . . ? 
C18 C17 H17 127.0 . . ? 
N2 C17 H17 127.0 . . ? 
C17 C18 N3 107.0(2) . . ? 
C17 C18 H18 126.5 . . ? 
N3 C18 H18 126.5 . . ? 
C16 N3 C18 111.41(18) . . ? 
C16 N3 C19 124.9(2) . . ? 
C18 N3 C19 123.7(2) . . ? 
N3 C19 H19A 109.5 . . ? 
N3 C19 H19B 109.5 . . ? 
H19A C19 H19B 109.5 . . ? 
N3 C19 H19C 109.5 . . ? 
H19A C19 H19C 109.5 . . ? 
H19B C19 H19C 109.5 . . ? 
F6 P F3 90.69(11) . . ? 
F6 P F2 91.18(10) . . ? 
F3 P F2 90.78(11) . . ? 
F6 P F4 178.98(11) . . ? 
F3 P F4 90.31(10) . . ? 
F2 P F4 89.01(10) . . ? 
F6 P F1 89.54(9) . . ? 
F3 P F1 90.31(9) . . ? 
F2 P F1 178.69(12) . . ? 
F4 P F1 90.26(9) . . ? 
F6 P F5 89.75(11) . . ? 
F3 P F5 178.77(12) . . ? 
F2 P F5 90.36(12) . . ? 
F4 P F5 89.24(11) . . ? 
F1 P F5 88.54(11) . . ? 
  
loop_ 
 _geom_torsion_atom_site_label_1 
 _geom_torsion_atom_site_label_2 
 _geom_torsion_atom_site_label_3 
 _geom_torsion_atom_site_label_4 
 _geom_torsion 
 _geom_torsion_site_symmetry_1 
 _geom_torsion_site_symmetry_2 
 _geom_torsion_site_symmetry_3 
 _geom_torsion_site_symmetry_4 
 _geom_torsion_publ_flag 
C16 Ru C1 C2 67.42(16) . . . . ? 
N1 Ru C1 C2 145.42(14) . . . . ? 
C3 Ru C1 C2 -29.30(16) . . . . ? 
C6 Ru C1 C2 -128.4(2) . . . . ? 
C4 Ru C1 C2 -65.14(17) . . . . ? 
C5 Ru C1 C2 -100.94(18) . . . . ? 
Cl Ru C1 C2 -111.4(2) . . . . ? 
C16 Ru C1 C6 -164.15(16) . . . . ? 
N1 Ru C1 C6 -86.16(16) . . . . ? 
C2 Ru C1 C6 128.4(2) . . . . ? 
C3 Ru C1 C6 99.13(19) . . . . ? 
C4 Ru C1 C6 63.28(19) . . . . ? 
C5 Ru C1 C6 27.49(18) . . . . ? 
Cl Ru C1 C6 17.0(3) . . . . ? 
C16 Ru C1 C7 -49.5(3) . . . . ? 
N1 Ru C1 C7 28.5(2) . . . . ? 
C2 Ru C1 C7 -116.9(3) . . . . ? 
C3 Ru C1 C7 -146.2(3) . . . . ? 
C6 Ru C1 C7 114.6(3) . . . . ? 
C4 Ru C1 C7 177.9(3) . . . . ? 
C5 Ru C1 C7 142.1(3) . . . . ? 
Cl Ru C1 C7 131.6(2) . . . . ? 
C2 C1 C7 C9 -30.8(3) . . . . ? 
C6 C1 C7 C9 151.3(3) . . . . ? 
Ru C1 C7 C9 60.2(3) . . . . ? 
C2 C1 C7 C8 92.3(3) . . . . ? 
C6 C1 C7 C8 -85.6(3) . . . . ? 
Ru C1 C7 C8 -176.8(2) . . . . ? 
C6 C1 C2 C3 -0.8(3) . . . . ? 
C7 C1 C2 C3 -178.7(2) . . . . ? 
Ru C1 C2 C3 55.76(19) . . . . ? 
C6 C1 C2 Ru -56.56(18) . . . . ? 
C7 C1 C2 Ru 125.5(2) . . . . ? 
C16 Ru C2 C1 -118.45(15) . . . . ? 
N1 Ru C2 C1 -44.60(18) . . . . ? 
C3 Ru C2 C1 132.4(2) . . . . ? 
C6 Ru C2 C1 31.30(15) . . . . ? 
C4 Ru C2 C1 104.26(18) . . . . ? 
C5 Ru C2 C1 67.62(17) . . . . ? 
Cl Ru C2 C1 153.61(12) . . . . ? 
C16 Ru C2 C3 109.17(18) . . . . ? 
N1 Ru C2 C3 -176.99(16) . . . . ? 
C1 Ru C2 C3 -132.4(2) . . . . ? 
C6 Ru C2 C3 -101.08(19) . . . . ? 
C4 Ru C2 C3 -28.13(19) . . . . ? 
C5 Ru C2 C3 -64.77(19) . . . . ? 
Cl Ru C2 C3 21.2(2) . . . . ? 
C1 C2 C3 C4 -1.7(3) . . . . ? 
Ru C2 C3 C4 53.9(2) . . . . ? 
C1 C2 C3 Ru -55.56(19) . . . . ? 
C16 Ru C3 C4 151.66(17) . . . . ? 
N1 Ru C3 C4 -123.9(4) . . . . ? 
C2 Ru C3 C4 -133.0(3) . . . . ? 
C1 Ru C3 C4 -103.95(19) . . . . ? 
C6 Ru C3 C4 -66.10(18) . . . . ? 
C5 Ru C3 C4 -29.79(18) . . . . ? 
Cl Ru C3 C4 59.55(18) . . . . ? 
C16 Ru C3 C2 -75.35(17) . . . . ? 
N1 Ru C3 C2 9.1(5) . . . . ? 
C1 Ru C3 C2 29.03(15) . . . . ? 
C6 Ru C3 C2 66.89(17) . . . . ? 
C4 Ru C3 C2 133.0(3) . . . . ? 
C5 Ru C3 C2 103.19(18) . . . . ? 
Cl Ru C3 C2 -167.46(14) . . . . ? 
C2 C3 C4 C5 3.2(4) . . . . ? 
Ru C3 C4 C5 55.6(2) . . . . ? 
C2 C3 C4 C10 -176.4(2) . . . . ? 
Ru C3 C4 C10 -124.0(3) . . . . ? 
C2 C3 C4 Ru -52.4(2) . . . . ? 
C16 Ru C4 C3 -39.5(2) . . . . ? 
N1 Ru C4 C3 153.92(17) . . . . ? 
C2 Ru C4 C3 29.16(16) . . . . ? 
C1 Ru C4 C3 65.99(17) . . . . ? 
C6 Ru C4 C3 102.37(18) . . . . ? 
C5 Ru C4 C3 130.7(2) . . . . ? 
Cl Ru C4 C3 -125.32(17) . . . . ? 
C16 Ru C4 C5 -170.25(14) . . . . ? 
N1 Ru C4 C5 23.2(3) . . . . ? 
C2 Ru C4 C5 -101.56(17) . . . . ? 
C1 Ru C4 C5 -64.73(16) . . . . ? 
C3 Ru C4 C5 -130.7(2) . . . . ? 
C6 Ru C4 C5 -28.34(15) . . . . ? 
Cl Ru C4 C5 103.96(15) . . . . ? 
C16 Ru C4 C10 74.7(5) . . . . ? 
N1 Ru C4 C10 -91.8(5) . . . . ? 
C2 Ru C4 C10 143.4(5) . . . . ? 
C1 Ru C4 C10 -179.8(5) . . . . ? 
C3 Ru C4 C10 114.2(5) . . . . ? 
C6 Ru C4 C10 -143.4(5) . . . . ? 
C5 Ru C4 C10 -115.1(5) . . . . ? 
Cl Ru C4 C10 -11.1(4) . . . . ? 
C3 C4 C5 C6 -2.3(4) . . . . ? 
C10 C4 C5 C6 177.4(3) . . . . ? 
Ru C4 C5 C6 52.8(2) . . . . ? 
C3 C4 C5 Ru -55.0(2) . . . . ? 
C10 C4 C5 Ru 124.6(3) . . . . ? 
C16 Ru C5 C6 -96.5(5) . . . . ? 
N1 Ru C5 C6 59.53(18) . . . . ? 
C2 Ru C5 C6 -65.78(17) . . . . ? 
C1 Ru C5 C6 -28.12(16) . . . . ? 
C3 Ru C5 C6 -103.42(18) . . . . ? 
C4 Ru C5 C6 -133.1(3) . . . . ? 
Cl Ru C5 C6 149.02(16) . . . . ? 
C16 Ru C5 C4 36.6(5) . . . . ? 
N1 Ru C5 C4 -167.37(15) . . . . ? 
C2 Ru C5 C4 67.33(17) . . . . ? 
C1 Ru C5 C4 104.98(18) . . . . ? 
C3 Ru C5 C4 29.69(16) . . . . ? 
C6 Ru C5 C4 133.1(3) . . . . ? 
Cl Ru C5 C4 -77.87(16) . . . . ? 
C4 C5 C6 C1 -0.3(4) . . . . ? 
Ru C5 C6 C1 52.9(2) . . . . ? 
C4 C5 C6 Ru -53.1(2) . . . . ? 
C2 C1 C6 C5 1.8(3) . . . . ? 
C7 C1 C6 C5 179.8(2) . . . . ? 
Ru C1 C6 C5 -53.9(2) . . . . ? 
C2 C1 C6 Ru 55.66(18) . . . . ? 
C7 C1 C6 Ru -126.3(2) . . . . ? 
C16 Ru C6 C5 159.99(18) . . . . ? 
N1 Ru C6 C5 -128.25(18) . . . . ? 
C2 Ru C6 C5 102.9(2) . . . . ? 
C1 Ru C6 C5 134.3(3) . . . . ? 
C3 Ru C6 C5 64.86(19) . . . . ? 
C4 Ru C6 C5 28.42(19) . . . . ? 
Cl Ru C6 C5 -40.0(2) . . . . ? 
C16 Ru C6 C1 25.7(2) . . . . ? 
N1 Ru C6 C1 97.42(15) . . . . ? 
C2 Ru C6 C1 -31.40(15) . . . . ? 
C3 Ru C6 C1 -69.47(17) . . . . ? 
C4 Ru C6 C1 -105.91(18) . . . . ? 
C5 Ru C6 C1 -134.3(3) . . . . ? 
Cl Ru C6 C1 -174.29(11) . . . . ? 
C16 Ru N1 C15 3.60(15) . . . . ? 
C2 Ru N1 C15 -77.48(18) . . . . ? 
C1 Ru N1 C15 -103.05(16) . . . . ? 
C3 Ru N1 C15 -84.4(4) . . . . ? 
C6 Ru N1 C15 -140.50(16) . . . . ? 
C4 Ru N1 C15 173.57(17) . . . . ? 
C5 Ru N1 C15 -171.44(15) . . . . ? 
Cl Ru N1 C15 92.28(15) . . . . ? 
C16 Ru N1 C11 -176.0(2) . . . . ? 
C2 Ru N1 C11 103.0(2) . . . . ? 
C1 Ru N1 C11 77.38(19) . . . . ? 
C3 Ru N1 C11 96.0(4) . . . . ? 
C6 Ru N1 C11 39.9(2) . . . . ? 
C4 Ru N1 C11 -6.0(3) . . . . ? 
C5 Ru N1 C11 9.0(2) . . . . ? 
Cl Ru N1 C11 -87.28(18) . . . . ? 
C15 N1 C11 C12 2.9(4) . . . . ? 
Ru N1 C11 C12 -177.56(19) . . . . ? 
N1 C11 C12 C13 -1.5(4) . . . . ? 
C11 C12 C13 C14 -0.9(4) . . . . ? 
C12 C13 C14 C15 1.7(3) . . . . ? 
C11 N1 C15 N2 177.38(19) . . . . ? 
Ru N1 C15 N2 -2.2(2) . . . . ? 
C11 N1 C15 C14 -2.0(3) . . . . ? 
Ru N1 C15 C14 178.42(15) . . . . ? 
C13 C14 C15 N1 -0.3(3) . . . . ? 
C13 C14 C15 N2 -179.6(2) . . . . ? 
N1 C15 N2 C16 -1.6(3) . . . . ? 
C14 C15 N2 C16 177.81(19) . . . . ? 
N1 C15 N2 C17 179.6(2) . . . . ? 
C14 C15 N2 C17 -1.0(3) . . . . ? 
C15 N2 C16 N3 -177.51(17) . . . . ? 
C17 N2 C16 N3 1.5(2) . . . . ? 
C15 N2 C16 Ru 4.7(2) . . . . ? 
C17 N2 C16 Ru -176.21(14) . . . . ? 
N1 Ru C16 N3 179.1(3) . . . . ? 
C2 Ru C16 N3 -53.3(2) . . . . ? 
C1 Ru C16 N3 -87.6(2) . . . . ? 
C3 Ru C16 N3 -16.8(3) . . . . ? 
C6 Ru C16 N3 -103.7(3) . . . . ? 
C4 Ru C16 N3 6.0(3) . . . . ? 
C5 Ru C16 N3 -23.3(6) . . . . ? 
Cl Ru C16 N3 92.1(2) . . . . ? 
N1 Ru C16 N2 -4.35(14) . . . . ? 
C2 Ru C16 N2 123.24(16) . . . . ? 
C1 Ru C16 N2 88.96(16) . . . . ? 
C3 Ru C16 N2 159.76(15) . . . . ? 
C6 Ru C16 N2 72.9(2) . . . . ? 
C4 Ru C16 N2 -177.40(14) . . . . ? 
C5 Ru C16 N2 153.3(4) . . . . ? 
Cl Ru C16 N2 -91.34(14) . . . . ? 
C16 N2 C17 C18 -0.8(2) . . . . ? 
C15 N2 C17 C18 178.1(2) . . . . ? 
N2 C17 C18 N3 -0.4(2) . . . . ? 
N2 C16 N3 C18 -1.7(2) . . . . ? 
Ru C16 N3 C18 175.12(19) . . . . ? 
N2 C16 N3 C19 177.5(2) . . . . ? 
Ru C16 N3 C19 -5.7(4) . . . . ? 
C17 C18 N3 C16 1.4(3) . . . . ? 
C17 C18 N3 C19 -177.9(2) . . . . ? 
  
_diffrn_measured_fraction_theta_max    0.958 
_diffrn_reflns_theta_full              31.00 
_diffrn_measured_fraction_theta_full   0.999 
_refine_diff_density_max    3.692 
_refine_diff_density_min   -1.334 
_refine_diff_density_rms    0.114 

#===END

  
data_alb64 
  
_audit_creation_method            SHELXL-97 
_chemical_name_systematic 
; 
 ? 
; 
_chemical_name_common             ? 
_chemical_melting_point           ? 
_chemical_formula_moiety 
 'C23 H30 N6 O2 Ru S2, 2 (C F3 O3 S)' 
_chemical_formula_sum 
 'C25 H30 F6 N6 O8 Ru S4' 
_chemical_formula_weight          885.86 
_chemical_absolute_configuration  ad 
  
loop_ 
 _atom_type_symbol 
 _atom_type_description 
 _atom_type_scat_dispersion_real 
 _atom_type_scat_dispersion_imag 
 _atom_type_scat_source 
 'C'  'C'   0.0033   0.0016 
 'International Tables Vol C Tables 4.2.6.8 and 6.1.1.4' 
 'H'  'H'   0.0000   0.0000 
 'International Tables Vol C Tables 4.2.6.8 and 6.1.1.4' 
 'N'  'N'   0.0061   0.0033 
 'International Tables Vol C Tables 4.2.6.8 and 6.1.1.4' 
 'O'  'O'   0.0106   0.0060 
 'International Tables Vol C Tables 4.2.6.8 and 6.1.1.4' 
 'F'  'F'   0.0171   0.0103 
 'International Tables Vol C Tables 4.2.6.8 and 6.1.1.4' 
 'S'  'S'   0.1246   0.1234 
 'International Tables Vol C Tables 4.2.6.8 and 6.1.1.4' 
 'Ru'  'Ru'  -1.2594   0.8363 
 'International Tables Vol C Tables 4.2.6.8 and 6.1.1.4' 
  
_symmetry_cell_setting            monoclinic 
_symmetry_space_group_name_H-M    'P 21' 
_symmetry_space_group_name_Hall   'P 2yb' 
  
loop_ 
 _symmetry_equiv_pos_as_xyz 
 'x, y, z' 
 '-x, y+1/2, -z' 
  
_cell_length_a                    9.3866(3) 
_cell_length_b                    10.9572(3) 
_cell_length_c                    16.3408(5) 
_cell_angle_alpha                 90.00 
_cell_angle_beta                  91.475(3) 
_cell_angle_gamma                 90.00 
_cell_volume                      1680.11(9) 
_cell_formula_units_Z             2 
_cell_measurement_temperature     100(2) 
_cell_measurement_reflns_used     20752 
_cell_measurement_theta_min       3.3420 
_cell_measurement_theta_max       29.7399 
  
_exptl_crystal_description        block 
_exptl_crystal_colour             yellow 
_exptl_crystal_size_max           0.1487 
_exptl_crystal_size_mid           0.0962 
_exptl_crystal_size_min           0.0873 
_exptl_crystal_density_meas       ? 
_exptl_crystal_density_diffrn     1.751 
_exptl_crystal_density_method     'not measured' 
_exptl_crystal_F_000              896 
_exptl_absorpt_coefficient_mu     0.805 
_exptl_absorpt_correction_type    analytical 
_exptl_absorpt_correction_T_min   0.911 
_exptl_absorpt_correction_T_max   0.942 
_exptl_absorpt_process_details     
; 
CrysAlisPro, Oxford Diffraction Ltd., 
Version 1.171.34.36 (release 02-08-2010 CrysAlis171 .NET) 
(compiled Aug  2 2010,13:00:58) 
Analytical numeric absorption correction using a multifaceted crystal
model based on expressions derived by R.C. Clark & J.S. Reid.
(Clark, R. C. & Reid, J. S. (1995). Acta Cryst. A51, 887-897)
; 
  
_exptl_special_details 
; 
 3782 Friedel pairs were measured.
; 
  
_diffrn_ambient_temperature       100(2) 
_diffrn_radiation_wavelength      0.71073 
_diffrn_radiation_type            MoK\a 
_diffrn_radiation_source          'SuperNova (Mo) X-ray Source' 
_diffrn_radiation_monochromator   mirror 
_diffrn_measurement_device_type   'SuperNova, Dual, Cu at zero, Atlas' 
_diffrn_measurement_method        '\w scans' 
_diffrn_detector_area_resol_mean  10.3196 
_diffrn_standards_number          ? 
_diffrn_standards_interval_count  ? 
_diffrn_standards_interval_time   ? 
_diffrn_standards_decay_%         ? 
_diffrn_reflns_number             30148 
_diffrn_reflns_av_R_equivalents   0.0291 
_diffrn_reflns_av_sigmaI/netI     0.0279 
_diffrn_reflns_limit_h_min        -12 
_diffrn_reflns_limit_h_max        12 
_diffrn_reflns_limit_k_min        -15 
_diffrn_reflns_limit_k_max        15 
_diffrn_reflns_limit_l_min        -22 
_diffrn_reflns_limit_l_max        21 
_diffrn_reflns_theta_min          3.35 
_diffrn_reflns_theta_max          29.81 
_reflns_number_total              8421 
_reflns_number_gt                 8114 
_reflns_threshold_expression      I>2\s(I) 
  
_computing_data_collection         
; 
CrysAlisPro, Oxford Diffraction Ltd., 
Version 1.171.34.36 (release 02-08-2010 CrysAlis171 .NET) 
(compiled Aug  2 2010,13:00:58) 
; 
_computing_cell_refinement         
; 
CrysAlisPro, Oxford Diffraction Ltd., 
Version 1.171.34.36 (release 02-08-2010 CrysAlis171 .NET) 
(compiled Aug  2 2010,13:00:58) 
; 
_computing_data_reduction          
; 
CrysAlisPro, Oxford Diffraction Ltd., 
Version 1.171.34.36 (release 02-08-2010 CrysAlis171 .NET) 
(compiled Aug  2 2010,13:00:58) 
; 
_computing_structure_solution     'SHELXS-97 (Sheldrick, 2008)' 
_computing_structure_refinement   'SHELXL-97 (Sheldrick, 2008)' 
_computing_molecular_graphics     ? 
_computing_publication_material   ? 
  
_refine_special_details 
; 
 Refinement of F^2^ against ALL reflections.  The weighted R-factor wR and 
 goodness of fit S are based on F^2^, conventional R-factors R are based 
 on F, with F set to zero for negative F^2^. The threshold expression of 
 F^2^ > 2sigma(F^2^) is used only for calculating R-factors(gt) etc. and is 
 not relevant to the choice of reflections for refinement.  R-factors based 
 on F^2^ are statistically about twice as large as those based on F, and R- 
 factors based on ALL data will be even larger. 
; 
  
_refine_ls_structure_factor_coef  Fsqd 
_refine_ls_matrix_type            full 
_refine_ls_weighting_scheme       calc 
_refine_ls_weighting_details 
 'calc w=1/[\s^2^(Fo^2^)+(0.0378P)^2^+2.4342P] where P=(Fo^2^+2Fc^2^)/3' 
_atom_sites_solution_primary      direct 
_atom_sites_solution_secondary    difmap 
_atom_sites_solution_hydrogens    geom 
_refine_ls_hydrogen_treatment     constr 
_refine_ls_extinction_method      none 
_refine_ls_extinction_coef        ? 
_refine_ls_abs_structure_details 
 'Flack H D (1983), Acta Cryst. A39, 876-881' 
_refine_ls_abs_structure_Flack    -0.01(2) 
_refine_ls_number_reflns          8421 
_refine_ls_number_parameters      457 
_refine_ls_number_restraints      1 
_refine_ls_R_factor_all           0.0357 
_refine_ls_R_factor_gt            0.0335 
_refine_ls_wR_factor_ref          0.0829 
_refine_ls_wR_factor_gt           0.0814 
_refine_ls_goodness_of_fit_ref    1.063 
_refine_ls_restrained_S_all       1.063 
_refine_ls_shift/su_max           0.000 
_refine_ls_shift/su_mean          0.000 
  
loop_ 
 _atom_site_label 
 _atom_site_type_symbol 
 _atom_site_fract_x 
 _atom_site_fract_y 
 _atom_site_fract_z 
 _atom_site_U_iso_or_equiv 
 _atom_site_adp_type 
 _atom_site_occupancy 
 _atom_site_symmetry_multiplicity 
 _atom_site_calc_flag 
 _atom_site_refinement_flags 
 _atom_site_disorder_assembly 
 _atom_site_disorder_group 
Ru Ru 0.52922(2) 0.714860(18) 0.245252(12) 0.01291(6) Uani 1 1 d . . . 
N1 N 0.6090(3) 0.8709(3) 0.18276(17) 0.0146(6) Uani 1 1 d . . . 
C1 C 0.6973(3) 0.8711(3) 0.11861(18) 0.0183(6) Uani 1 1 d . . . 
H1 H 0.7318 0.7954 0.0989 0.022 Uiso 1 1 calc R . . 
C2 C 0.7391(4) 0.9775(3) 0.0808(2) 0.0241(7) Uani 1 1 d . . . 
H2 H 0.8012 0.9747 0.0358 0.029 Uiso 1 1 calc R . . 
C3 C 0.6894(4) 1.0881(3) 0.1091(2) 0.0302(8) Uani 1 1 d . . . 
H3 H 0.7178 1.1623 0.0843 0.036 Uiso 1 1 calc R . . 
C4 C 0.5978(4) 1.0893(3) 0.1741(2) 0.0277(7) Uani 1 1 d . . . 
H4 H 0.5608 1.1643 0.1936 0.033 Uiso 1 1 calc R . . 
C5 C 0.5604(3) 0.9799(3) 0.21027(18) 0.0162(6) Uani 1 1 d . . . 
C6 C 0.4629(3) 0.9738(3) 0.27994(18) 0.0151(5) Uani 1 1 d . . . 
C7 C 0.4063(4) 1.0774(3) 0.31623(19) 0.0210(6) Uani 1 1 d . . . 
H7 H 0.4307 1.1564 0.2972 0.025 Uiso 1 1 calc R . . 
C8 C 0.3144(4) 1.0641(3) 0.3802(2) 0.0235(7) Uani 1 1 d . . . 
H8 H 0.2734 1.1337 0.4050 0.028 Uiso 1 1 calc R . . 
C9 C 0.2827(4) 0.9477(3) 0.4080(2) 0.0253(7) Uani 1 1 d . . . 
H9 H 0.2208 0.9365 0.4524 0.030 Uiso 1 1 calc R . . 
C10 C 0.3431(3) 0.8482(3) 0.3695(2) 0.0203(6) Uani 1 1 d . . . 
H10 H 0.3206 0.7685 0.3880 0.024 Uiso 1 1 calc R . . 
N2 N 0.4322(3) 0.8608(3) 0.30712(18) 0.0154(6) Uani 1 1 d . . . 
N3 N 0.3398(2) 0.7160(3) 0.16854(13) 0.0163(4) Uani 1 1 d . . . 
C11 C 0.3183(4) 0.7891(3) 0.1030(2) 0.0217(6) Uani 1 1 d . . . 
H11 H 0.3945 0.8390 0.0856 0.026 Uiso 1 1 calc R . . 
C12 C 0.1891(4) 0.7939(4) 0.0600(2) 0.0266(7) Uani 1 1 d . . . 
H12 H 0.1770 0.8467 0.0143 0.032 Uiso 1 1 calc R . . 
C13 C 0.0782(3) 0.7209(5) 0.08462(19) 0.0279(7) Uani 1 1 d . . . 
H13 H -0.0113 0.7234 0.0561 0.034 Uiso 1 1 calc R . . 
C14 C 0.0985(3) 0.6440(3) 0.1512(2) 0.0251(7) Uani 1 1 d . . . 
H14 H 0.0236 0.5923 0.1683 0.030 Uiso 1 1 calc R . . 
C15 C 0.2300(3) 0.6433(3) 0.1927(2) 0.0191(6) Uani 1 1 d . . . 
C16 C 0.2708(3) 0.5711(3) 0.2632(2) 0.0187(6) Uani 1 1 d . . . 
C17 C 0.4069(4) 0.5823(3) 0.2992(2) 0.0159(6) Uani 1 1 d . . . 
N4 N 0.2011(3) 0.4822(3) 0.30406(18) 0.0227(6) Uani 1 1 d . . . 
C18 C 0.0566(4) 0.4328(4) 0.2915(3) 0.0317(8) Uani 1 1 d . . . 
H18A H 0.0431 0.3635 0.3284 0.048 Uiso 1 1 calc R . . 
H18B H 0.0440 0.4057 0.2346 0.048 Uiso 1 1 calc R . . 
H18C H -0.0135 0.4964 0.3031 0.048 Uiso 1 1 calc R . . 
N5 N 0.2814(3) 0.4353(3) 0.36264(19) 0.0242(6) Uani 1 1 d . . . 
N6 N 0.4049(3) 0.4967(2) 0.35879(17) 0.0207(5) Uani 1 1 d . . . 
C19 C 0.5137(4) 0.4654(3) 0.4213(2) 0.0284(7) Uani 1 1 d . . . 
H19A H 0.4934 0.5082 0.4723 0.043 Uiso 1 1 calc R . . 
H19B H 0.6077 0.4900 0.4024 0.043 Uiso 1 1 calc R . . 
H19C H 0.5128 0.3771 0.4308 0.043 Uiso 1 1 calc R . . 
S1 S 0.71970(7) 0.71598(10) 0.33295(4) 0.01693(12) Uani 1 1 d . . . 
O1 O 0.7879(3) 0.5977(2) 0.35296(16) 0.0263(5) Uani 1 1 d . . . 
C20 C 0.8598(3) 0.8126(3) 0.3008(2) 0.0222(7) Uani 1 1 d . . . 
H20A H 0.9399 0.8077 0.3403 0.033 Uiso 1 1 calc R . . 
H20B H 0.8255 0.8969 0.2975 0.033 Uiso 1 1 calc R . . 
H20C H 0.8912 0.7863 0.2468 0.033 Uiso 1 1 calc R . . 
C21 C 0.6806(4) 0.7892(4) 0.42811(19) 0.0268(7) Uani 1 1 d . . . 
H21A H 0.6048 0.7443 0.4552 0.040 Uiso 1 1 calc R . . 
H21B H 0.6493 0.8732 0.4175 0.040 Uiso 1 1 calc R . . 
H21C H 0.7664 0.7901 0.4636 0.040 Uiso 1 1 calc R . . 
S2 S 0.63754(9) 0.56841(8) 0.17097(5) 0.01650(17) Uani 1 1 d . . . 
O2 O 0.7836(2) 0.5974(2) 0.14381(16) 0.0238(5) Uani 1 1 d . . . 
C22 C 0.5355(4) 0.5288(3) 0.0811(2) 0.0219(6) Uani 1 1 d . . . 
H22A H 0.5318 0.5986 0.0436 0.033 Uiso 1 1 calc R . . 
H22B H 0.4385 0.5067 0.0963 0.033 Uiso 1 1 calc R . . 
H22C H 0.5801 0.4592 0.0541 0.033 Uiso 1 1 calc R . . 
C23 C 0.6481(4) 0.4215(3) 0.2179(2) 0.0233(7) Uani 1 1 d . . . 
H23A H 0.7099 0.3685 0.1860 0.035 Uiso 1 1 calc R . . 
H23B H 0.5526 0.3857 0.2197 0.035 Uiso 1 1 calc R . . 
H23C H 0.6876 0.4297 0.2737 0.035 Uiso 1 1 calc R . . 
O3 O 0.6419(3) 0.1691(3) 0.47334(16) 0.0397(7) Uani 1 1 d . . . 
O4 O 0.7548(4) 0.0850(4) 0.3535(2) 0.0641(12) Uani 1 1 d . . . 
O5 O 0.7896(4) 0.2975(3) 0.3927(3) 0.0673(13) Uani 1 1 d . . . 
S3 S 0.75443(9) 0.17365(8) 0.41663(5) 0.02086(16) Uani 1 1 d . . . 
C24 C 0.9140(4) 0.1353(4) 0.4797(3) 0.0366(10) Uani 1 1 d . . . 
F1 F 0.9124(3) 0.1836(4) 0.55198(19) 0.0833(15) Uani 1 1 d . . . 
F2 F 0.9141(4) 0.0124(3) 0.4964(2) 0.0682(9) Uani 1 1 d . . . 
F3 F 1.0300(3) 0.1539(3) 0.4416(2) 0.0596(8) Uani 1 1 d . . . 
O6 O 0.8610(4) 0.8567(3) 0.9134(2) 0.0423(7) Uani 1 1 d . . . 
O7 O 0.6817(3) 0.7979(2) 0.81008(16) 0.0289(5) Uani 1 1 d . . . 
O8 O 0.6577(4) 0.7310(4) 0.95019(17) 0.0572(10) Uani 1 1 d . . . 
S4 S 0.75228(11) 0.77031(9) 0.88752(5) 0.02950(19) Uani 1 1 d . . . 
C25 C 0.8587(5) 0.6346(4) 0.8634(3) 0.0444(12) Uani 1 1 d . . . 
F4 F 0.7720(4) 0.5422(2) 0.84057(19) 0.0575(9) Uani 1 1 d . . . 
F5 F 0.9464(4) 0.6557(3) 0.8046(2) 0.0677(9) Uani 1 1 d . . . 
F6 F 0.9302(4) 0.5952(3) 0.9297(2) 0.0786(12) Uani 1 1 d . . . 
  
loop_ 
 _atom_site_aniso_label 
 _atom_site_aniso_U_11 
 _atom_site_aniso_U_22 
 _atom_site_aniso_U_33 
 _atom_site_aniso_U_23 
 _atom_site_aniso_U_13 
 _atom_site_aniso_U_12 
Ru 0.01083(9) 0.01348(9) 0.01445(9) -0.00109(10) 0.00107(7) -0.00048(10) 
N1 0.0126(13) 0.0176(13) 0.0136(12) -0.0005(10) -0.0009(10) -0.0012(10) 
C1 0.0177(14) 0.0235(16) 0.0137(13) -0.0016(11) 0.0041(11) -0.0031(12) 
C2 0.0290(18) 0.0267(17) 0.0170(15) -0.0016(13) 0.0068(13) -0.0043(14) 
C3 0.042(2) 0.0222(17) 0.0265(17) 0.0002(14) 0.0124(15) -0.0074(16) 
C4 0.042(2) 0.0153(15) 0.0259(16) -0.0016(13) 0.0097(15) -0.0020(14) 
C5 0.0186(15) 0.0170(14) 0.0131(13) -0.0016(11) 0.0006(11) 0.0009(12) 
C6 0.0138(13) 0.0166(13) 0.0148(13) -0.0022(11) 0.0001(10) 0.0006(11) 
C7 0.0223(15) 0.0185(15) 0.0220(15) -0.0035(12) 0.0010(12) 0.0065(12) 
C8 0.0218(16) 0.0227(16) 0.0260(16) -0.0061(13) 0.0019(13) 0.0074(13) 
C9 0.0221(16) 0.0322(18) 0.0222(16) -0.0066(14) 0.0090(13) 0.0008(14) 
C10 0.0183(15) 0.0239(16) 0.0191(15) -0.0005(12) 0.0070(12) -0.0013(13) 
N2 0.0085(12) 0.0216(14) 0.0160(13) -0.0002(11) 0.0002(10) 0.0001(11) 
N3 0.0128(10) 0.0172(10) 0.0190(10) -0.0029(14) -0.0009(8) 0.0036(15) 
C11 0.0187(15) 0.0252(16) 0.0212(15) -0.0045(12) 0.0007(12) 0.0019(13) 
C12 0.0246(17) 0.0337(18) 0.0213(16) -0.0049(14) -0.0044(13) 0.0076(14) 
C13 0.0161(13) 0.0388(18) 0.0286(14) -0.0127(19) -0.0045(11) 0.0048(18) 
C14 0.0111(14) 0.0290(18) 0.0350(18) -0.0121(14) -0.0004(13) 0.0008(12) 
C15 0.0128(14) 0.0173(15) 0.0273(15) -0.0081(12) 0.0024(12) 0.0049(11) 
C16 0.0135(13) 0.0164(14) 0.0265(15) -0.0057(12) 0.0067(12) -0.0033(11) 
C17 0.0153(15) 0.0124(14) 0.0204(15) -0.0037(12) 0.0065(12) -0.0003(12) 
N4 0.0180(13) 0.0198(13) 0.0308(15) -0.0041(11) 0.0089(11) -0.0026(11) 
C18 0.0171(16) 0.032(2) 0.046(2) -0.0047(17) 0.0126(15) -0.0074(15) 
N5 0.0227(14) 0.0204(14) 0.0303(15) -0.0038(12) 0.0123(12) -0.0035(11) 
N6 0.0222(14) 0.0162(12) 0.0239(13) -0.0001(10) 0.0063(11) 0.0006(11) 
C19 0.0293(18) 0.0300(18) 0.0258(17) 0.0076(14) 0.0006(14) 0.0012(15) 
S1 0.0140(3) 0.0191(3) 0.0175(3) -0.0006(4) -0.0018(2) -0.0017(4) 
O1 0.0208(11) 0.0224(12) 0.0354(13) 0.0057(10) -0.0077(10) 0.0019(10) 
C20 0.0150(15) 0.0249(16) 0.0267(16) -0.0006(13) -0.0021(12) -0.0015(13) 
C21 0.0238(16) 0.044(2) 0.0129(13) -0.0049(14) -0.0013(12) -0.0028(15) 
S2 0.0120(3) 0.0147(3) 0.0229(4) -0.0031(3) 0.0012(3) -0.0001(3) 
O2 0.0136(10) 0.0214(12) 0.0367(13) -0.0052(10) 0.0052(9) 0.0015(9) 
C22 0.0188(15) 0.0240(16) 0.0230(15) -0.0061(13) 0.0025(12) -0.0001(13) 
C23 0.0207(16) 0.0164(15) 0.0330(18) 0.0012(13) 0.0035(14) 0.0032(13) 
O3 0.0163(11) 0.073(2) 0.0303(13) 0.0082(13) 0.0061(10) 0.0017(12) 
O4 0.047(2) 0.079(3) 0.065(2) -0.049(2) -0.0190(17) 0.0194(19) 
O5 0.050(2) 0.045(2) 0.109(3) 0.044(2) 0.028(2) 0.0109(17) 
S3 0.0221(4) 0.0215(4) 0.0192(3) 0.0001(3) 0.0035(3) 0.0039(3) 
C24 0.0177(17) 0.050(3) 0.042(2) -0.0168(19) 0.0077(15) 0.0055(17) 
F1 0.0423(15) 0.145(4) 0.0614(18) -0.042(2) -0.0233(14) 0.024(2) 
F2 0.0555(19) 0.065(2) 0.084(2) 0.0350(18) -0.0006(16) 0.0165(16) 
F3 0.0206(11) 0.0656(19) 0.094(2) 0.0205(17) 0.0187(13) 0.0082(12) 
O6 0.057(2) 0.0307(15) 0.0396(16) -0.0118(13) 0.0060(14) -0.0176(14) 
O7 0.0395(15) 0.0207(11) 0.0268(12) 0.0037(10) 0.0064(11) 0.0036(11) 
O8 0.082(2) 0.064(3) 0.0257(13) 0.0047(16) 0.0155(14) -0.034(2) 
S4 0.0462(5) 0.0220(4) 0.0204(4) -0.0007(3) 0.0043(4) -0.0086(4) 
C25 0.054(3) 0.0257(19) 0.052(3) -0.0052(18) -0.030(2) 0.0007(19) 
F4 0.082(2) 0.0173(11) 0.0702(19) -0.0030(11) -0.0480(17) -0.0010(12) 
F5 0.067(2) 0.0503(18) 0.087(2) -0.0176(17) 0.0151(18) 0.0207(16) 
F6 0.103(3) 0.0417(17) 0.087(2) 0.0039(16) -0.071(2) 0.0012(18) 
  
_geom_special_details 
; 
 All esds (except the esd in the dihedral angle between two l.s. planes) 
 are estimated using the full covariance matrix.  The cell esds are taken 
 into account individually in the estimation of esds in distances, angles 
 and torsion angles; correlations between esds in cell parameters are only 
 used when they are defined by crystal symmetry.  An approximate (isotropic) 
 treatment of cell esds is used for estimating esds involving l.s. planes. 
; 
  
loop_ 
 _geom_bond_atom_site_label_1 
 _geom_bond_atom_site_label_2 
 _geom_bond_distance 
 _geom_bond_site_symmetry_2 
 _geom_bond_publ_flag 
Ru C17 2.064(4) . ? 
Ru N2 2.111(3) . ? 
Ru N1 2.137(3) . ? 
Ru N3 2.149(2) . ? 
Ru S1 2.2624(6) . ? 
Ru S2 2.2684(9) . ? 
N1 C1 1.353(4) . ? 
N1 C5 1.358(4) . ? 
C1 C2 1.381(5) . ? 
C1 H1 0.9500 . ? 
C2 C3 1.383(5) . ? 
C2 H2 0.9500 . ? 
C3 C4 1.383(5) . ? 
C3 H3 0.9500 . ? 
C4 C5 1.387(4) . ? 
C4 H4 0.9500 . ? 
C5 C6 1.480(4) . ? 
C6 N2 1.349(4) . ? 
C6 C7 1.393(4) . ? 
C7 C8 1.380(5) . ? 
C7 H7 0.9500 . ? 
C8 C9 1.388(5) . ? 
C8 H8 0.9500 . ? 
C9 C10 1.387(5) . ? 
C9 H9 0.9500 . ? 
C10 N2 1.343(4) . ? 
C10 H10 0.9500 . ? 
N3 C11 1.348(4) . ? 
N3 C15 1.368(4) . ? 
C11 C12 1.387(5) . ? 
C11 H11 0.9500 . ? 
C12 C13 1.381(5) . ? 
C12 H12 0.9500 . ? 
C13 C14 1.385(6) . ? 
C13 H13 0.9500 . ? 
C14 C15 1.394(4) . ? 
C14 H14 0.9500 . ? 
C15 C16 1.441(5) . ? 
C16 N4 1.359(4) . ? 
C16 C17 1.397(5) . ? 
C17 N6 1.352(4) . ? 
N4 N5 1.308(4) . ? 
N4 C18 1.469(4) . ? 
C18 H18A 0.9800 . ? 
C18 H18B 0.9800 . ? 
C18 H18C 0.9800 . ? 
N5 N6 1.343(4) . ? 
N6 C19 1.466(5) . ? 
C19 H19A 0.9800 . ? 
C19 H19B 0.9800 . ? 
C19 H19C 0.9800 . ? 
S1 O1 1.478(3) . ? 
S1 C20 1.778(3) . ? 
S1 C21 1.796(3) . ? 
C20 H20A 0.9800 . ? 
C20 H20B 0.9800 . ? 
C20 H20C 0.9800 . ? 
C21 H21A 0.9800 . ? 
C21 H21B 0.9800 . ? 
C21 H21C 0.9800 . ? 
S2 O2 1.486(2) . ? 
S2 C23 1.784(3) . ? 
S2 C22 1.786(3) . ? 
C22 H22A 0.9800 . ? 
C22 H22B 0.9800 . ? 
C22 H22C 0.9800 . ? 
C23 H23A 0.9800 . ? 
C23 H23B 0.9800 . ? 
C23 H23C 0.9800 . ? 
O3 S3 1.424(3) . ? 
O4 S3 1.417(3) . ? 
O5 S3 1.453(4) . ? 
S3 C24 1.844(4) . ? 
C24 F3 1.285(5) . ? 
C24 F1 1.295(5) . ? 
C24 F2 1.374(6) . ? 
O6 S4 1.448(3) . ? 
O7 S4 1.445(3) . ? 
O8 S4 1.438(3) . ? 
S4 C25 1.840(5) . ? 
C25 F5 1.302(6) . ? 
C25 F6 1.331(5) . ? 
C25 F4 1.346(5) . ? 
  
loop_ 
 _geom_angle_atom_site_label_1 
 _geom_angle_atom_site_label_2 
 _geom_angle_atom_site_label_3 
 _geom_angle 
 _geom_angle_site_symmetry_1 
 _geom_angle_site_symmetry_3 
 _geom_angle_publ_flag 
C17 Ru N2 94.41(10) . . ? 
C17 Ru N1 166.68(12) . . ? 
N2 Ru N1 77.50(12) . . ? 
C17 Ru N3 77.99(13) . . ? 
N2 Ru N3 85.09(11) . . ? 
N1 Ru N3 90.67(11) . . ? 
C17 Ru S1 99.94(10) . . ? 
N2 Ru S1 92.07(8) . . ? 
N1 Ru S1 90.99(8) . . ? 
N3 Ru S1 176.32(6) . . ? 
C17 Ru S2 89.58(10) . . ? 
N2 Ru S2 175.57(9) . . ? 
N1 Ru S2 98.22(8) . . ? 
N3 Ru S2 93.87(8) . . ? 
S1 Ru S2 89.14(3) . . ? 
C1 N1 C5 118.2(3) . . ? 
C1 N1 Ru 126.9(2) . . ? 
C5 N1 Ru 114.8(2) . . ? 
N1 C1 C2 122.3(3) . . ? 
N1 C1 H1 118.8 . . ? 
C2 C1 H1 118.8 . . ? 
C1 C2 C3 119.2(3) . . ? 
C1 C2 H2 120.4 . . ? 
C3 C2 H2 120.4 . . ? 
C4 C3 C2 119.1(3) . . ? 
C4 C3 H3 120.4 . . ? 
C2 C3 H3 120.4 . . ? 
C3 C4 C5 119.2(3) . . ? 
C3 C4 H4 120.4 . . ? 
C5 C4 H4 120.4 . . ? 
N1 C5 C4 121.9(3) . . ? 
N1 C5 C6 115.8(3) . . ? 
C4 C5 C6 122.3(3) . . ? 
N2 C6 C7 121.4(3) . . ? 
N2 C6 C5 115.8(3) . . ? 
C7 C6 C5 122.8(3) . . ? 
C8 C7 C6 119.3(3) . . ? 
C8 C7 H7 120.4 . . ? 
C6 C7 H7 120.4 . . ? 
C7 C8 C9 119.2(3) . . ? 
C7 C8 H8 120.4 . . ? 
C9 C8 H8 120.4 . . ? 
C10 C9 C8 118.7(3) . . ? 
C10 C9 H9 120.6 . . ? 
C8 C9 H9 120.6 . . ? 
N2 C10 C9 122.2(3) . . ? 
N2 C10 H10 118.9 . . ? 
C9 C10 H10 118.9 . . ? 
C10 N2 C6 119.1(3) . . ? 
C10 N2 Ru 124.8(2) . . ? 
C6 N2 Ru 116.1(2) . . ? 
C11 N3 C15 118.5(3) . . ? 
C11 N3 Ru 124.8(2) . . ? 
C15 N3 Ru 116.5(2) . . ? 
N3 C11 C12 122.4(3) . . ? 
N3 C11 H11 118.8 . . ? 
C12 C11 H11 118.8 . . ? 
C13 C12 C11 119.1(3) . . ? 
C13 C12 H12 120.4 . . ? 
C11 C12 H12 120.4 . . ? 
C12 C13 C14 119.4(3) . . ? 
C12 C13 H13 120.3 . . ? 
C14 C13 H13 120.3 . . ? 
C13 C14 C15 119.2(3) . . ? 
C13 C14 H14 120.4 . . ? 
C15 C14 H14 120.4 . . ? 
N3 C15 C14 121.4(3) . . ? 
N3 C15 C16 111.3(3) . . ? 
C14 C15 C16 127.3(3) . . ? 
N4 C16 C17 107.6(3) . . ? 
N4 C16 C15 131.6(3) . . ? 
C17 C16 C15 120.6(3) . . ? 
N6 C17 C16 102.3(3) . . ? 
N6 C17 Ru 144.5(3) . . ? 
C16 C17 Ru 113.2(2) . . ? 
N5 N4 C16 111.4(3) . . ? 
N5 N4 C18 118.1(3) . . ? 
C16 N4 C18 130.5(3) . . ? 
N4 C18 H18A 109.5 . . ? 
N4 C18 H18B 109.5 . . ? 
H18A C18 H18B 109.5 . . ? 
N4 C18 H18C 109.5 . . ? 
H18A C18 H18C 109.5 . . ? 
H18B C18 H18C 109.5 . . ? 
N4 N5 N6 104.5(3) . . ? 
N5 N6 C17 114.1(3) . . ? 
N5 N6 C19 115.9(3) . . ? 
C17 N6 C19 129.9(3) . . ? 
N6 C19 H19A 109.5 . . ? 
N6 C19 H19B 109.5 . . ? 
H19A C19 H19B 109.5 . . ? 
N6 C19 H19C 109.5 . . ? 
H19A C19 H19C 109.5 . . ? 
H19B C19 H19C 109.5 . . ? 
O1 S1 C20 105.55(15) . . ? 
O1 S1 C21 107.28(17) . . ? 
C20 S1 C21 99.15(17) . . ? 
O1 S1 Ru 117.76(11) . . ? 
C20 S1 Ru 113.23(11) . . ? 
C21 S1 Ru 112.03(12) . . ? 
S1 C20 H20A 109.5 . . ? 
S1 C20 H20B 109.5 . . ? 
H20A C20 H20B 109.5 . . ? 
S1 C20 H20C 109.5 . . ? 
H20A C20 H20C 109.5 . . ? 
H20B C20 H20C 109.5 . . ? 
S1 C21 H21A 109.5 . . ? 
S1 C21 H21B 109.5 . . ? 
H21A C21 H21B 109.5 . . ? 
S1 C21 H21C 109.5 . . ? 
H21A C21 H21C 109.5 . . ? 
H21B C21 H21C 109.5 . . ? 
O2 S2 C23 106.25(16) . . ? 
O2 S2 C22 106.61(16) . . ? 
C23 S2 C22 99.01(17) . . ? 
O2 S2 Ru 115.98(10) . . ? 
C23 S2 Ru 115.39(12) . . ? 
C22 S2 Ru 111.93(11) . . ? 
S2 C22 H22A 109.5 . . ? 
S2 C22 H22B 109.5 . . ? 
H22A C22 H22B 109.5 . . ? 
S2 C22 H22C 109.5 . . ? 
H22A C22 H22C 109.5 . . ? 
H22B C22 H22C 109.5 . . ? 
S2 C23 H23A 109.5 . . ? 
S2 C23 H23B 109.5 . . ? 
H23A C23 H23B 109.5 . . ? 
S2 C23 H23C 109.5 . . ? 
H23A C23 H23C 109.5 . . ? 
H23B C23 H23C 109.5 . . ? 
O4 S3 O3 117.7(2) . . ? 
O4 S3 O5 116.1(3) . . ? 
O3 S3 O5 112.7(2) . . ? 
O4 S3 C24 103.5(2) . . ? 
O3 S3 C24 103.52(17) . . ? 
O5 S3 C24 100.2(2) . . ? 
F3 C24 F1 114.1(4) . . ? 
F3 C24 F2 104.8(3) . . ? 
F1 C24 F2 102.7(4) . . ? 
F3 C24 S3 112.3(3) . . ? 
F1 C24 S3 112.8(3) . . ? 
F2 C24 S3 109.3(3) . . ? 
O8 S4 O7 114.13(19) . . ? 
O8 S4 O6 115.5(2) . . ? 
O7 S4 O6 115.04(19) . . ? 
O8 S4 C25 105.0(3) . . ? 
O7 S4 C25 102.77(18) . . ? 
O6 S4 C25 102.0(2) . . ? 
F5 C25 F6 110.1(5) . . ? 
F5 C25 F4 108.5(4) . . ? 
F6 C25 F4 105.6(4) . . ? 
F5 C25 S4 111.8(3) . . ? 
F6 C25 S4 110.7(3) . . ? 
F4 C25 S4 109.9(3) . . ? 
  
loop_ 
 _geom_torsion_atom_site_label_1 
 _geom_torsion_atom_site_label_2 
 _geom_torsion_atom_site_label_3 
 _geom_torsion_atom_site_label_4 
 _geom_torsion 
 _geom_torsion_site_symmetry_1 
 _geom_torsion_site_symmetry_2 
 _geom_torsion_site_symmetry_3 
 _geom_torsion_site_symmetry_4 
 _geom_torsion_publ_flag 
C17 Ru N1 C1 -125.3(5) . . . . ? 
N2 Ru N1 C1 -178.8(3) . . . . ? 
N3 Ru N1 C1 -94.0(3) . . . . ? 
S1 Ru N1 C1 89.3(3) . . . . ? 
S2 Ru N1 C1 0.0(3) . . . . ? 
C17 Ru N1 C5 52.6(7) . . . . ? 
N2 Ru N1 C5 -0.9(2) . . . . ? 
N3 Ru N1 C5 83.9(2) . . . . ? 
S1 Ru N1 C5 -92.8(2) . . . . ? 
S2 Ru N1 C5 177.9(2) . . . . ? 
C5 N1 C1 C2 0.0(5) . . . . ? 
Ru N1 C1 C2 177.8(3) . . . . ? 
N1 C1 C2 C3 0.0(5) . . . . ? 
C1 C2 C3 C4 -0.7(6) . . . . ? 
C2 C3 C4 C5 1.4(6) . . . . ? 
C1 N1 C5 C4 0.6(5) . . . . ? 
Ru N1 C5 C4 -177.4(3) . . . . ? 
C1 N1 C5 C6 179.3(3) . . . . ? 
Ru N1 C5 C6 1.3(3) . . . . ? 
C3 C4 C5 N1 -1.3(5) . . . . ? 
C3 C4 C5 C6 -180.0(3) . . . . ? 
N1 C5 C6 N2 -0.9(4) . . . . ? 
C4 C5 C6 N2 177.8(3) . . . . ? 
N1 C5 C6 C7 178.6(3) . . . . ? 
C4 C5 C6 C7 -2.7(5) . . . . ? 
N2 C6 C7 C8 -1.4(5) . . . . ? 
C5 C6 C7 C8 179.0(3) . . . . ? 
C6 C7 C8 C9 1.2(5) . . . . ? 
C7 C8 C9 C10 -0.9(5) . . . . ? 
C8 C9 C10 N2 0.8(5) . . . . ? 
C9 C10 N2 C6 -0.9(5) . . . . ? 
C9 C10 N2 Ru 179.9(3) . . . . ? 
C7 C6 N2 C10 1.2(5) . . . . ? 
C5 C6 N2 C10 -179.2(3) . . . . ? 
C7 C6 N2 Ru -179.5(2) . . . . ? 
C5 C6 N2 Ru 0.1(3) . . . . ? 
C17 Ru N2 C10 10.4(3) . . . . ? 
N1 Ru N2 C10 179.7(3) . . . . ? 
N3 Ru N2 C10 87.9(3) . . . . ? 
S1 Ru N2 C10 -89.8(3) . . . . ? 
C17 Ru N2 C6 -168.9(2) . . . . ? 
N1 Ru N2 C6 0.4(2) . . . . ? 
N3 Ru N2 C6 -91.3(2) . . . . ? 
S1 Ru N2 C6 91.0(2) . . . . ? 
C17 Ru N3 C11 -179.9(3) . . . . ? 
N2 Ru N3 C11 84.5(3) . . . . ? 
N1 Ru N3 C11 7.1(3) . . . . ? 
S2 Ru N3 C11 -91.1(3) . . . . ? 
C17 Ru N3 C15 5.3(2) . . . . ? 
N2 Ru N3 C15 -90.2(2) . . . . ? 
N1 Ru N3 C15 -167.6(2) . . . . ? 
S2 Ru N3 C15 94.1(2) . . . . ? 
C15 N3 C11 C12 0.7(5) . . . . ? 
Ru N3 C11 C12 -174.0(3) . . . . ? 
N3 C11 C12 C13 -0.4(5) . . . . ? 
C11 C12 C13 C14 -0.4(5) . . . . ? 
C12 C13 C14 C15 1.0(5) . . . . ? 
C11 N3 C15 C14 -0.1(5) . . . . ? 
Ru N3 C15 C14 175.0(2) . . . . ? 
C11 N3 C15 C16 179.9(3) . . . . ? 
Ru N3 C15 C16 -5.0(3) . . . . ? 
C13 C14 C15 N3 -0.8(5) . . . . ? 
C13 C14 C15 C16 179.3(3) . . . . ? 
N3 C15 C16 N4 -175.0(3) . . . . ? 
C14 C15 C16 N4 4.9(6) . . . . ? 
N3 C15 C16 C17 1.3(4) . . . . ? 
C14 C15 C16 C17 -178.8(3) . . . . ? 
N4 C16 C17 N6 0.3(3) . . . . ? 
C15 C16 C17 N6 -176.8(3) . . . . ? 
N4 C16 C17 Ru -179.7(2) . . . . ? 
C15 C16 C17 Ru 3.2(4) . . . . ? 
N2 Ru C17 N6 -100.3(4) . . . . ? 
N1 Ru C17 N6 -152.2(4) . . . . ? 
N3 Ru C17 N6 175.7(5) . . . . ? 
S1 Ru C17 N6 -7.4(4) . . . . ? 
S2 Ru C17 N6 81.6(4) . . . . ? 
N2 Ru C17 C16 79.7(2) . . . . ? 
N1 Ru C17 C16 27.8(7) . . . . ? 
N3 Ru C17 C16 -4.3(2) . . . . ? 
S1 Ru C17 C16 172.6(2) . . . . ? 
S2 Ru C17 C16 -98.3(2) . . . . ? 
C17 C16 N4 N5 -0.3(4) . . . . ? 
C15 C16 N4 N5 176.3(3) . . . . ? 
C17 C16 N4 C18 -179.4(3) . . . . ? 
C15 C16 N4 C18 -2.7(6) . . . . ? 
C16 N4 N5 N6 0.2(3) . . . . ? 
C18 N4 N5 N6 179.4(3) . . . . ? 
N4 N5 N6 C17 0.0(4) . . . . ? 
N4 N5 N6 C19 177.4(3) . . . . ? 
C16 C17 N6 N5 -0.2(4) . . . . ? 
Ru C17 N6 N5 179.8(3) . . . . ? 
C16 C17 N6 C19 -177.1(3) . . . . ? 
Ru C17 N6 C19 2.9(7) . . . . ? 
C17 Ru S1 O1 50.91(16) . . . . ? 
N2 Ru S1 O1 145.76(15) . . . . ? 
N1 Ru S1 O1 -136.72(14) . . . . ? 
S2 Ru S1 O1 -38.51(12) . . . . ? 
C17 Ru S1 C20 174.67(16) . . . . ? 
N2 Ru S1 C20 -90.49(15) . . . . ? 
N1 Ru S1 C20 -12.96(15) . . . . ? 
S2 Ru S1 C20 85.24(13) . . . . ? 
C17 Ru S1 C21 -74.20(17) . . . . ? 
N2 Ru S1 C21 20.64(17) . . . . ? 
N1 Ru S1 C21 98.17(17) . . . . ? 
S2 Ru S1 C21 -163.63(15) . . . . ? 
C17 Ru S2 O2 -154.18(16) . . . . ? 
N1 Ru S2 O2 36.65(14) . . . . ? 
N3 Ru S2 O2 127.89(15) . . . . ? 
S1 Ru S2 O2 -54.23(13) . . . . ? 
C17 Ru S2 C23 -29.02(17) . . . . ? 
N1 Ru S2 C23 161.81(16) . . . . ? 
N3 Ru S2 C23 -106.95(16) . . . . ? 
S1 Ru S2 C23 70.93(14) . . . . ? 
C17 Ru S2 C22 83.19(16) . . . . ? 
N1 Ru S2 C22 -85.97(15) . . . . ? 
N3 Ru S2 C22 5.26(15) . . . . ? 
S1 Ru S2 C22 -176.85(13) . . . . ? 
O4 S3 C24 F3 67.0(4) . . . . ? 
O3 S3 C24 F3 -169.6(3) . . . . ? 
O5 S3 C24 F3 -53.1(4) . . . . ? 
O4 S3 C24 F1 -162.3(4) . . . . ? 
O3 S3 C24 F1 -39.0(4) . . . . ? 
O5 S3 C24 F1 77.5(4) . . . . ? 
O4 S3 C24 F2 -48.8(4) . . . . ? 
O3 S3 C24 F2 74.6(3) . . . . ? 
O5 S3 C24 F2 -168.9(3) . . . . ? 
O8 S4 C25 F5 177.5(3) . . . . ? 
O7 S4 C25 F5 57.9(3) . . . . ? 
O6 S4 C25 F5 -61.6(3) . . . . ? 
O8 S4 C25 F6 -59.3(4) . . . . ? 
O7 S4 C25 F6 -179.0(4) . . . . ? 
O6 S4 C25 F6 61.6(4) . . . . ? 
O8 S4 C25 F4 56.9(4) . . . . ? 
O7 S4 C25 F4 -62.7(4) . . . . ? 
O6 S4 C25 F4 177.8(3) . . . . ? 
  
_diffrn_measured_fraction_theta_max    0.919 
_diffrn_reflns_theta_full              28.00 
_diffrn_measured_fraction_theta_full   0.993 
_refine_diff_density_max    1.922 
_refine_diff_density_min   -0.602 
_refine_diff_density_rms    0.089 

_vrf_PLAT220_alb53
;
PROBLEM: Large Non-Solvent C Ueq(max)/Ueq(min): 5.2 Ratio
RESPONSE: It is no unusual behaviour for a terminal atom, like a methyl carbon,
to show higher displacement parameters than the other atoms.
;
